# Supplementary material for: Potential of Hybrid CNN-RF Model for Early Crop Mapping with Limited Input Data
Source: MDPI journal article supplement (doi:10.3390/rs13091629), 2021-04-21
Supplement: s1 [file s1]

# Potential of Hybrid CNN-RF Model for Early Crop Mapping with Limited Input Data

Geun-Ho Kwak, Chan-won Park, Kyung-do Lee, Sang-il Na, Ho-yong Ahn and No-Wook Park \*

**Table S1.** Optimal hyper-parameter values determined for combination cases of different training data sizes and the lengths of time-series in Anbandegi ( $p$  is the number of input variables).

| Model             | Hyper-parameter<br>(layer description)                       | Optimal hyper-parameters<br>(T1/T2/T3/T4/T5)   |
|-------------------|--------------------------------------------------------------|------------------------------------------------|
| CNN and<br>CNN-RF | Image patch size                                             | 5 × 5                                          |
|                   | Convolution layer 1                                          | A1: 128 / 256 / 256 / 128 / 128                |
|                   |                                                              | A2: 64 / 256 / 256 / 256 / 128                 |
|                   |                                                              | A3: 128 / 128 / 256 / 256 / 256                |
|                   | Convolution layer 2                                          | A4: 128 / 128 / 128 / 64 / 256                 |
|                   |                                                              | A5: 128 / 256 / 128 / 64 / 128                 |
|                   |                                                              | A6: 64 / 256 / 128 / 64 / 128                  |
|                   | Convolution layer 3                                          | A7: 64 / 128 / 64 / 256 / 64                   |
|                   |                                                              | A8: 64 / 64 / 128 / 64 / 64                    |
|                   | Dropout                                                      | A1: 0.7 / 0.5 / 0.5 / 0.3 / 0.7                |
|                   |                                                              | A2: 0.5 / 0.5 / 0.5 / 0.3 / 0.7                |
|                   |                                                              | A3: 0.5 / 0.5 / 0.3 / 0.5 / 0.3                |
|                   |                                                              | A4: 0.3 / 0.3 / 0.5 / 0.3 / 0.3                |
|                   |                                                              | A5: 0.7 / 0.3 / 0.5 / 0.3 / 0.3                |
|                   |                                                              | A6: 0.3 / 0.5 / 0.5 / 0.5 / 0.5                |
|                   |                                                              | A7: 0.5 / 0.7 / 0.3 / 0.7 / 0.7                |
|                   |                                                              | A8: 0.3 / 0.5 / 0.3 / 0.7 / 0.3                |
|                   |                                                              | A1: 0.005 / 0.001 / 0.0005 / 0.0005 / 0.005    |
|                   |                                                              | A2: 0.0005 / 0.0001 / 0.0005 / 0.005 / 0.0005  |
|                   |                                                              | A3: 0.0005 / 0.0005 / 0.0001 / 0.0001 / 0.0001 |
|                   |                                                              | A4: 0.005 / 0.0005 / 0.0001 / 0.0005 / 0.001   |
|                   |                                                              | A5: 0.0005 / 0.0001 / 0.005 / 0.001 / 0.0001   |
|                   |                                                              | A6: 0.0001 / 0.0005 / 0.0005 / 0.0001 / 0.001  |
|                   |                                                              | A7: 0.0001 / 0.005 / 0.005 / 0.0001 / 0.005    |
|                   |                                                              | A8: 0.0005 / 0.001 / 0.0005 / 0.0001 / 0.0001  |
| RF                | The number of trees to be<br>grown in the forest ( $ntree$ ) | A1: 100 / 500 / 500 / 100 / 100                |
|                   |                                                              | A2: 500 / 100 / 1000 / 500 / 100               |
|                   |                                                              | A3: 100 / 100 / 500 / 1000 / 100               |
|                   |                                                              | A4: 1000 / 100 / 500 / 100 / 100               |
|                   |                                                              | A5: 500 / 100 / 500 / 100 / 100                |
|                   |                                                              | A6: 500 / 1000 / 500 / 100 / 100               |
|                   |                                                              | A7: 500 / 100 / 100 / 100 / 100                |
|                   |                                                              | A8: 100 / 100 / 500 / 100 / 100                |
|                   | The number of variables for<br>node partitioning ( $mtry$ )  | All cases (A1 to A8): $p/2$                    |
| CNN-RF            | $ntree$                                                      | A1: 500 / 500 / 100 / 1000 / 100               |
|                   |                                                              | A2: 100 / 500 / 1000 / 1000 / 100              |
|                   |                                                              | A3: 100 / 100 / 500 / 500 / 100                |
|                   |                                                              | A4: 100 / 500 / 500 / 1000 / 100               |
|                   |                                                              | A5: 100 / 100 / 500 / 500 / 1000               |
|                   |                                                              | A6: 100 / 500 / 100 / 1000 / 100               |
|                   |                                                              | A7: 100 / 100 / 500 / 100 / 1000               |
|                   |                                                              | A8: 100 / 100 / 500 / 100 / 100                |
|                   | $mtry$                                                       | All cases (A1 to A8): $\sqrt{p}$               |

**Table S2.** Optimal hyper-parameter values determined for combination cases of different training data sizes and the lengths of time-series in Hapcheon ( $p$  is the number of input variables).

| Model             | Hyper-parameter<br>(layer description)                            | Optimal hyper-parameters<br>(T1/T2/T3/T4/T5) |
|-------------------|-------------------------------------------------------------------|----------------------------------------------|
| CNN and<br>CNN-RF | Image patch size                                                  | 5 × 5                                        |
|                   | Convolution layer 1                                               | H1: 256 / 256 / 256 / 256 / 256              |
|                   | Convolution layer 2                                               | H2: 256 / 256 / 256 / 256 / 256              |
|                   | Convolution layer 3                                               | H3: 256 / 128 / 256 / 256 / 64               |
|                   | Dropout                                                           | H1: 0.7 / 0.7 / 0.3 / 0.5 / 0.5              |
|                   |                                                                   | H2: 0.3 / 0.7 / 0.7 / 0.7 / 0.7              |
|                   |                                                                   | H3: 0.3 / 0.3 / 0.3 / 0.3 / 0.7              |
|                   | Learning rate                                                     | H1: 0.001 / 0.0001 / 0.005 / 0.0005 / 0.001  |
|                   |                                                                   | H2: 0.0001 / 0.001 / 0.001 / 0.005 / 0.0001  |
|                   |                                                                   | H3: 0.001 / 0.001 / 0.0001 / 0.001 / 0.001   |
| RF                | The number of trees to be<br>grown in the forest ( <i>ntree</i> ) | H1: 500 / 500 / 500 / 500 / 500              |
|                   |                                                                   | H2: 100 / 100 / 1000 / 1000 / 500            |
|                   |                                                                   | H3: 1000 / 100 / 100 / 500 / 100             |
| CNN-RF            | The number of variables for<br>node partitioning ( <i>mtry</i> )  | All cases (H1 to H3): $\sqrt{p}$             |
|                   | <i>ntree</i>                                                      | H1: 1000 / 500 / 1000 / 500 / 500            |
|                   |                                                                   | H2: 100 / 100 / 500 / 100 / 1000             |
|                   |                                                                   | H3: 100 / 100 / 100 / 500 / 500              |
|                   | <i>mtry</i>                                                       | All cases (H1 to H3): $\sqrt{p}$             |

**Table S3.** Average overall accuracy with standard deviation of five classification results with respect to combination cases of different training data sizes and the lengths of time-series in Anbandegi (the best case is shown in bold).

| Classifier | Date | Training data size  |                     |                     |                     |                     |
|------------|------|---------------------|---------------------|---------------------|---------------------|---------------------|
|            |      | T1                  | T2                  | T3                  | T4                  | T5                  |
| RF         | A1   | 54.11 ± 1.22        | 57.49 ± 1.21        | 65.35 ± 1.21        | 69.14 ± 0.69        | 73.49 ± 0.27        |
|            | A2   | 51.54 ± 2.85        | 53.75 ± 2.14        | 63.31 ± 0.44        | 66.72 ± 0.72        | 70.53 ± 0.38        |
|            | A3   | 71.92 ± 1.61        | 72.79 ± 1.61        | 80.15 ± 0.58        | 81.57 ± 0.65        | 85.13 ± 0.35        |
|            | A4   | 69.80 ± 2.53        | 72.51 ± 1.98        | 79.79 ± 0.57        | 81.81 ± 0.55        | 85.10 ± 0.46        |
|            | A5   | 75.18 ± 1.53        | 78.79 ± 1.20        | 82.45 ± 0.79        | 85.55 ± 0.46        | 87.62 ± 0.22        |
|            | A6   | 67.28 ± 2.10        | 74.61 ± 1.20        | 79.91 ± 0.51        | 82.88 ± 0.43        | 85.89 ± 0.32        |
|            | A7   | 80.07 ± 0.54        | 82.35 ± 0.84        | 84.85 ± 0.80        | 88.32 ± 0.51        | 90.07 ± 0.18        |
|            | A8   | 82.62 ± 1.00        | 84.93 ± 0.38        | 86.73 ± 1.12        | 90.67 ± 0.16        | 92.23 ± 0.19        |
| CNN        | A1   | 61.70 ± 5.55        | 69.77 ± 4.05        | 74.63 ± 3.35        | 82.64 ± 0.94        | 83.82 ± 1.21        |
|            | A2   | 69.02 ± 4.15        | 70.65 ± 5.11        | 79.57 ± 2.53        | 83.80 ± 1.24        | <b>86.48 ± 0.65</b> |
|            | A3   | 80.65 ± 2.59        | 85.06 ± 2.68        | 90.64 ± 1.19        | <b>92.75 ± 0.75</b> | <b>94.35 ± 0.51</b> |
|            | A4   | 77.94 ± 3.87        | 82.81 ± 2.55        | 90.35 ± 0.80        | 92.64 ± 1.14        | <b>94.36 ± 0.25</b> |
|            | A5   | 83.05 ± 4.81        | 85.42 ± 3.79        | <b>93.05 ± 0.57</b> | 94.39 ± 0.70        | <b>96.03 ± 0.61</b> |
|            | A6   | 83.72 ± 5.74        | 84.53 ± 4.03        | 91.50 ± 0.93        | 93.34 ± 0.83        | <b>95.57 ± 0.16</b> |
|            | A7   | <b>88.68 ± 1.56</b> | 91.40 ± 1.92        | <b>94.42 ± 0.14</b> | 95.61 ± 0.64        | 97.08 ± 0.16        |
|            | A8   | <b>92.32 ± 2.13</b> | 93.19 ± 0.89        | <b>94.86 ± 0.74</b> | 96.35 ± 0.58        | <b>97.57 ± 0.33</b> |
| CNN-RF     | A1   | <b>67.09 ± 4.64</b> | <b>76.47 ± 1.96</b> | <b>79.90 ± 1.25</b> | <b>83.04 ± 0.41</b> | <b>84.94 ± 0.36</b> |
|            | A2   | <b>72.31 ± 1.76</b> | <b>75.06 ± 1.91</b> | <b>80.26 ± 1.69</b> | <b>84.02 ± 0.76</b> | 86.32 ± 0.63        |
|            | A3   | <b>82.62 ± 5.12</b> | <b>87.15 ± 2.83</b> | <b>90.96 ± 0.91</b> | 92.56 ± 0.77        | 94.21 ± 0.24        |
|            | A4   | <b>81.07 ± 3.72</b> | <b>85.88 ± 2.47</b> | <b>90.64 ± 0.48</b> | <b>92.90 ± 0.80</b> | 94.34 ± 0.10        |
|            | A5   | <b>83.58 ± 3.22</b> | <b>86.59 ± 4.64</b> | 92.90 ± 0.32        | <b>95.07 ± 0.54</b> | 95.99 ± 0.26        |
|            | A6   | <b>85.42 ± 2.00</b> | <b>86.81 ± 3.36</b> | <b>91.70 ± 0.54</b> | <b>94.20 ± 0.70</b> | 95.33 ± 0.08        |
|            | A7   | 88.65 ± 1.63        | <b>92.13 ± 0.70</b> | 94.01 ± 0.17        | <b>96.19 ± 0.22</b> | <b>97.16 ± 0.20</b> |
|            | A8   | 92.24 ± 1.75        | <b>93.25 ± 0.71</b> | 94.70 ± 0.38        | <b>96.38 ± 0.30</b> | 97.56 ± 0.23        |

**Table S4.** Average overall accuracy with standard deviation of five classification results with respect to combination cases of different training data sizes and the lengths of time-series in Hapcheon (the best case is shown in bold).

| Classifier | Date | Training data size  |                     |                     |                     |                     |
|------------|------|---------------------|---------------------|---------------------|---------------------|---------------------|
|            |      | T1                  | T2                  | T3                  | T4                  | T5                  |
| RF         | H1   | 62.04 ± 2.20        | 68.33 ± 0.94        | 73.28 ± 0.78        | 76.53 ± 0.82        | 78.99 ± 0.57        |
|            | H2   | 62.16 ± 2.77        | 71.59 ± 0.76        | 73.23 ± 0.43        | 77.58 ± 0.32        | 80.68 ± 0.40        |
|            | H3   | 63.97 ± 3.11        | 71.09 ± 1.84        | 74.11 ± 0.75        | 79.65 ± 0.53        | 82.64 ± 0.52        |
| CNN        | H1   | 75.32 ± 3.66        | 81.26 ± 0.48        | 82.08 ± 0.96        | 84.75 ± 0.47        | 86.53 ± 0.79        |
|            | H2   | 75.18 ± 3.76        | 79.81 ± 2.19        | 84.02 ± 1.66        | 86.60 ± 1.30        | 87.99 ± 2.23        |
|            | H3   | 74.77 ± 5.19        | 80.75 ± 1.28        | 87.82 ± 0.80        | 90.62 ± 1.08        | 91.74 ± 0.81        |
| CNN-RF     | H1   | <b>78.97 ± 2.78</b> | <b>82.61 ± 0.59</b> | <b>85.03 ± 0.52</b> | <b>86.11 ± 0.38</b> | <b>87.16 ± 0.24</b> |
|            | H2   | <b>79.79 ± 1.84</b> | <b>83.42 ± 2.01</b> | <b>86.61 ± 0.49</b> | <b>87.59 ± 0.68</b> | <b>88.74 ± 0.30</b> |
|            | H3   | <b>78.96 ± 3.99</b> | <b>85.36 ± 0.94</b> | <b>88.43 ± 1.02</b> | <b>90.96 ± 0.75</b> | <b>92.09 ± 0.37</b> |
